# Supplementary material for: Novel Flp pilus biogenesis-dependent natural transformation
Source: Front Microbiol. 2015 Feb 10;6:84. doi: 10.3389/fmicb.2015.00084 (PMC4322843; doi:10.3389/fmicb.2015.00084)
Supplement: Supplementary file 1 [file DataSheet1.XLSX]

## Sheet: Sheet2
	Supplementary Material
	Novel Flp pilus biogenesis-dependent natural transformation
	Angel Angelov1, Paul Bergen1, Florian Nadler1, Philipp Hornburg1, Antoni Lichev1, Maria Übelacker1, Fiona Pachl2, Bernhard Küster2 and Wolfgang Liebl1*
	1 Lehrstuhl für Mikrobiologie, Technische Universität München, Emil-Ramann-Straße 4, D-85354 Freising-Weihenstephan, Germany
	2 Lehrstuhl für Proteomik und Bioanalytik, Technische Universität München, Emil-Erlenmeyer-Forum 5, D-85354 Freising-Weihenstephan, Germany
	Supplementary Table 1. Mass spectrometry analysis of gel slices from enriched extracellular, high-molecular weight protein complexes
				Mass spectrometry data
		Strain	Gel area	Accession number	Locus tag	Description	predicted MW [kDa]	LFQ intensity	MS/MS Count	Unique Peptides
	Experiment 1	trpE16	3-5 kDa	gi|239918296	Mlut_18170	Flp1 prepilin	7.999	1216800000	33	1
				gi|239917644	Mlut_11420	transaldolase	39.244	13559000	1	1
		Δflp:k	3-5 kDa	gi|239917644	Mlut_11420	transaldolase	39.244	32389000	2	1
				gi|239918588	Mlut_21240	geranylgeranyl pyrophosphate synthase	36.722	2625900	1	1
				gi|239916949	Mlut_04110	hypothetical protein Mlut_04110	10.605	826190	2	2
	Experiment 2	trpE16	4-5 kDa	gi|239918296	Mlut_18170	Flp1 prepilin	7.999	1560100000	42	2
				gi|239917575	Mlut_10670	threonyl-tRNA synthetase	75.652	13718000	1	1
				gi|239917509	Mlut_09980	sulfate adenylyltransferase subunit 2	35.193	627130	1	1
			5-6 kDa	gi|239918296	Mlut_18170	Flp1 prepilin	7.999	13573000	6	2
				gi|239917553	Mlut_10450	hypothetical protein Mlut_10450	16.867	13230000	3	3
				gi|239917002	Mlut_04650	hypothetical protein Mlut_04650	49.368	551590	3	2
				gi|239917406	Mlut_08870	UDP-glucose pyrophosphorylase	32.95	213800	1	1
			6-8 kDa	gi|239918296	Mlut_18170	Flp1 prepilin	7.999	10823000	5	2
				gi|239917553	Mlut_10450	hypothetical protein Mlut_10450	16.867	44175000	6	3
				gi|239918014	Mlut_15260	hypothetical protein Mlut_15260	7.6136	19916000	3	2
				gi|239918175	Mlut_16920	30S ribosomal protein S13P	13.688	8504100	6	3
				gi|239917471	Mlut_09560	cAMP-binding protein	24.652	4855000	1	1
				gi|239917574	Mlut_10660	DNA-directed DNA polymerase III PolC	133.04	2073500	1	1
				gi|239918210	Mlut_17270	50S ribosomal protein L10P	18.235	1933100	2	2
				gi|239917447	Mlut_09300	acyl carrier protein	8.7867	1299800	1	1
				gi|239918313	Mlut_18340	copper-resistance protein, CopA family	56.476	963650	1	1
				gi|239918258	Mlut_17790	branched-chain alpha-keto acid dehydrogenase subunit E2	50.82	643190	1	1
				gi|239916729	Mlut_01690	esterase	25.902	630950	1	1
			10-13 kDa	gi|239917147	Mlut_06140	transcriptional regulator	14.334	90853000	1	1
	Explanation:
	LFQ intensity	MS1-based label-free intensity quantitative value based on the summed up and normalized MS1 ion current of all isotopic clusters associated with the identified protein.
	MS/MS Count	The number of MS/MS spectra recorded for the peptide.
	Unique Peptides	Number of unique peptide sequences associated with a given protein. The term unique means that this peptide sequence is unique for this data set.
	The presence of proteins with a higher molecular weight than that of the analysed gel area is probably due to protein fragments originating from lysed cells in the pili preparation
